# Supplementary material
Source: Springer Nature journal article supplement (https://www.springermedizin.de/resource/supplementary/13033_2012_124_MOESM8_ESM.pdf/9651918)

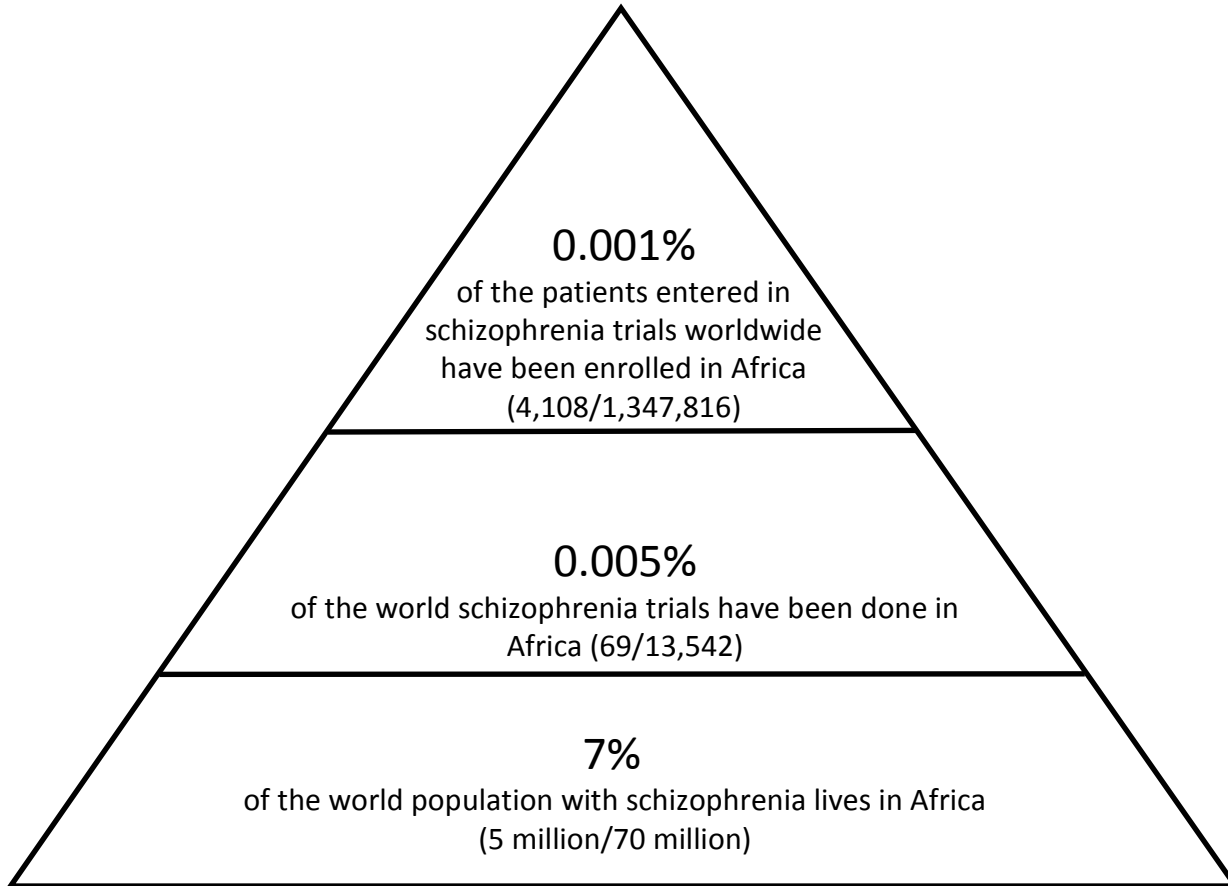

Supplement: MOESM8 [file 9651918]
